# Supplementary material for: Prussian blue functionalized microcapsules for effective removal of cesium in a water environment
Source: Royal Society of Chemistry journal article supplement (doi:10.1039/c6ra01450j), 2016-01-01
Supplement: c6ra01450j1.pdf [file c6ra01450j1.pdf]

## Supporting Information

# Prussian Blue Functionalized Microcapsules for Effective Removal of Cesium in Water Environment

Shanshan Feng,<sup>a</sup> Xiaoda Li,<sup>a</sup> Fang Ma,<sup>a</sup> Renfa Liu,<sup>b</sup> Guanglei Fu,<sup>a</sup> Sen Xing,<sup>a</sup> Xiuli  
Yue,<sup>a\*</sup>

<sup>a</sup>State Key Laboratory of Urban Water Resources and Environment, School of Municipal and  
Environmental Engineering, Harbin Institute of Technology, Harbin, 150001, People's Republic of  
China

<sup>b</sup>Department of Biomedical Engineering, College of Engineering, Peking University, Beijing  
100871, People's Republic of China

---

\* To whom correspondence should be addressed. E-mail: xiulidx@163.com (X. Yue)

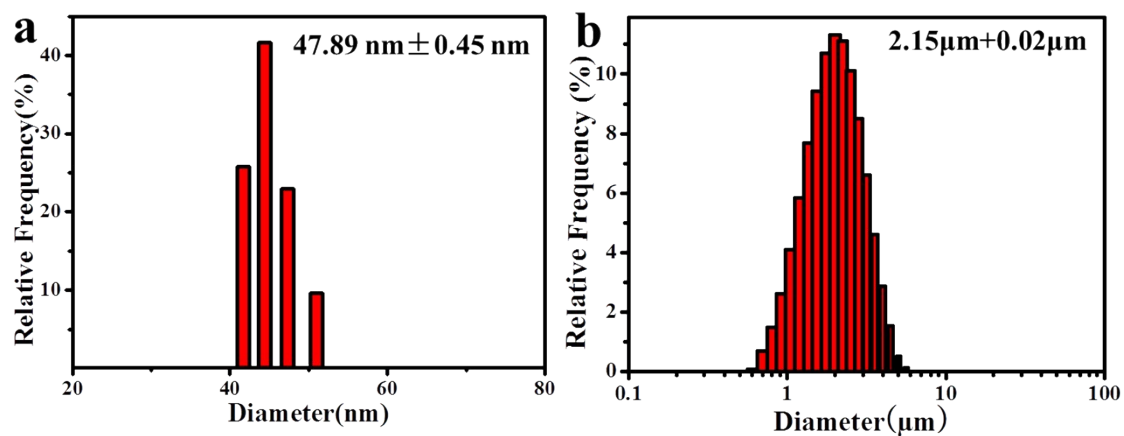

**Figure S1.** Size distribution (a) PB NPs, (b) PLA MCs. Size distribution of PB NPs was determined by dynamic light scattering (DLS) tests, while that of PLA MCs were measured with static light scattering (SLS) tests.

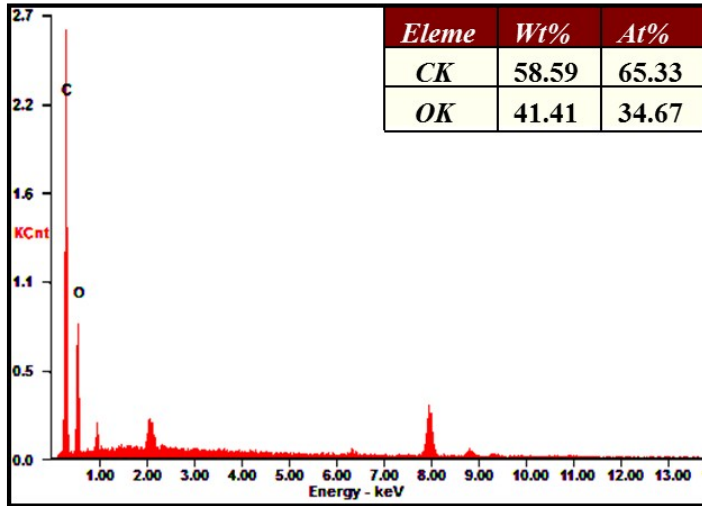

Figure S2. The EDS spectra of the PLA MCs.

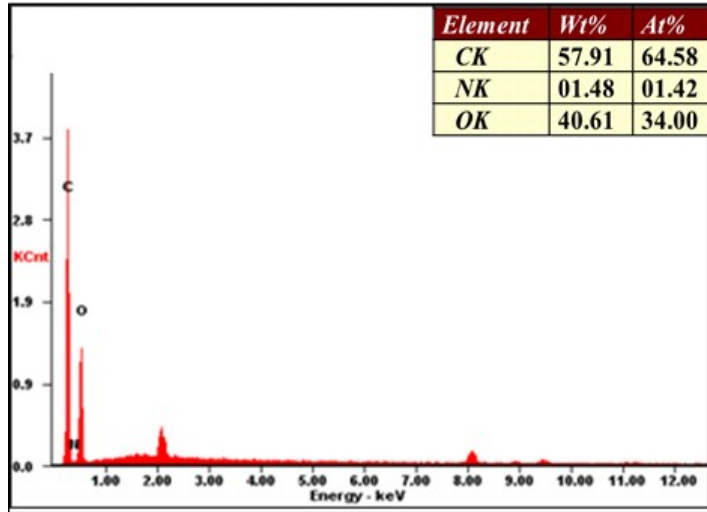

**Figure S3.** The EDS spectra of the PEI-PLA MCs.

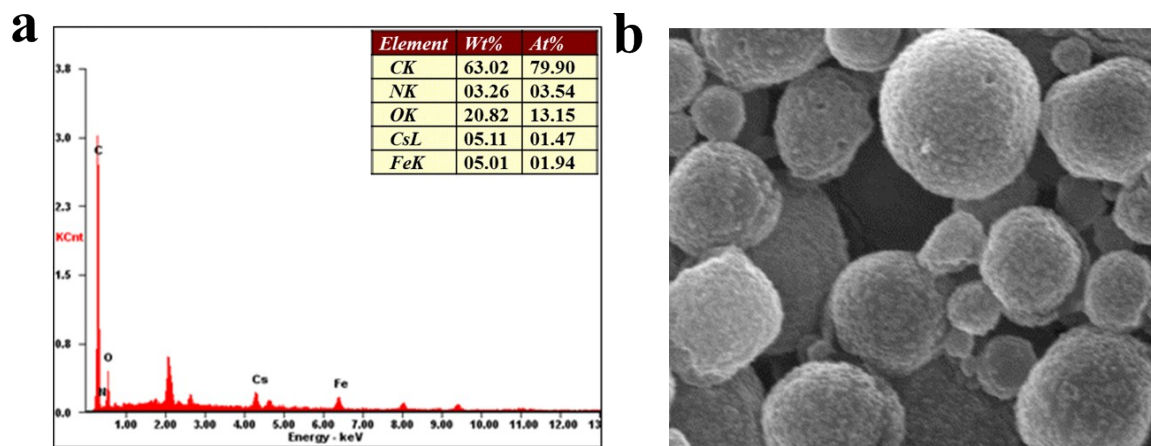

**Figure S4.** The image of EDAX (a) and SEM (b) of the PB-MCs after Cs adsorption.

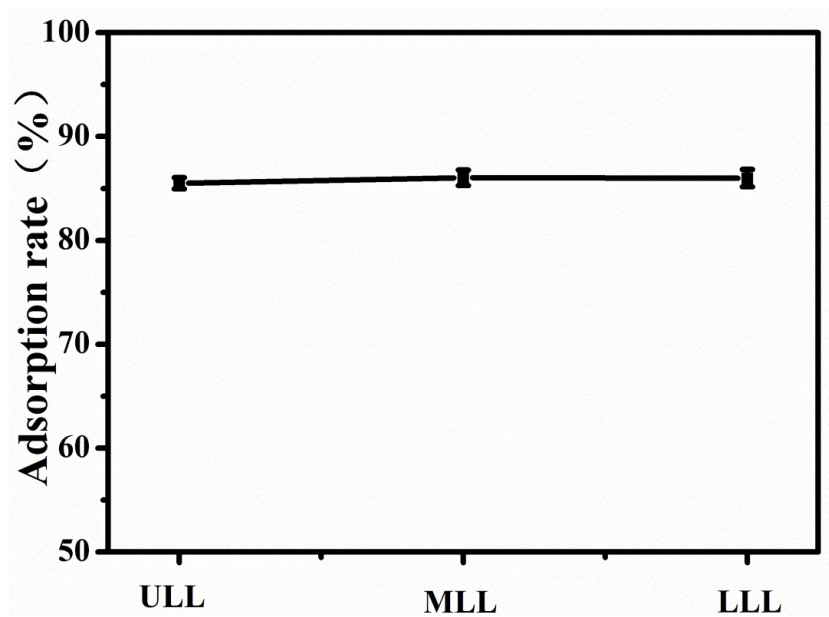

**Figure S5.** The effect of the distribution of cesium ions in the upper liquid layer (ULL), the middle liquid layer (MLL) and the lower liquid layer (LLL). ( $C_0 = 5.0$  mg/L;  $m = 0.03$  g;  $V = 20$  ml;  $r = 200$ rpm;  $\text{pH} = 5.5$  and  $T = 293$  K).
